# Supplementary material for: Efficient detection of polymeric mechanoradicalsviafluorescent molecular probes stabilized by steric hindrance
Source: Royal Society of Chemistry journal article supplement (doi:10.1039/d3py00296a), 2023-01-01
Supplement: d3py00296a1.pdf [file d3py00296a1.pdf]

## Supplementary Information

### Efficient detection of polymeric mechanoradicals via fluorescent molecular probes stabilized by steric hindrance

Takumi Yamamoto<sup>a</sup> and Hideyuki Otsuka<sup>a,b\*</sup>

<sup>a</sup>Department of Chemical Science and Engineering, Tokyo Institute of Technology, 2-12-1 Ookayama, Meguro-ku, Tokyo 152-8550, Japan

<sup>b</sup>Living Systems Materialogy (LiSM) Research Group, International Research Frontiers Initiative (IRFI), Tokyo Institute of Technology, 4259 Nagatsuta-cho, Midori-ku, Yokohama 226-8501, Japan.

\*Author to whom correspondence should be addressed: [otsuka@mac.titech.ac.jp](mailto:otsuka@mac.titech.ac.jp)

#### Table of contents

|                                                                                      |    |
|--------------------------------------------------------------------------------------|----|
| 1. General Information                                                               | 2  |
| 2. Experimental Procedure                                                            | 2  |
| 3. Computational Details                                                             | 3  |
| 4. Preparation of Polymer Samples                                                    | 4  |
| 5. Synthesis Procedure                                                               | 4  |
| 6. Supplementary Figures                                                             | 9  |
| 7. Calculated and Experimental Peak Wavelengths of DAAN Derivatives                  | 14 |
| 8. Calculated Fluorescence Properties of DAAN Derivatives Using UM06-2X/6-311+G(d,p) | 14 |
| 9. Calculated Angles of DAAN Derivatives Using UM06-2X/6-311+G(d,p)                  | 14 |
| 10. Cartesian Coordinates of All the Optimized Geometries by DFT Calculation         | 15 |
| 11. Extracted Results of TD-DFT Calculation                                          | 25 |

## 1. General Information

All commercially available polymers, reagents and solvents were purchased from Sigma-Aldrich, Wako Pure Chemical Industries, Tokyo Chemical Industry, or Kanto Chemical and used as received, unless otherwise noted.  $^1\text{H}$  NMR spectra were obtained using a 500 MHz Bruker AVANCE III HD500 spectrometer.  $^{13}\text{C}$  NMR spectra were obtained using a 400 MHz JEOL JNM-ECZ400S/L1 spectrometer. Gel permeation chromatography (GPC) measurements were performed in THF at 40 °C on TOSOH HLC-8320 GPC system equipped with a guard column (TOSOH TSK guard column Super H-L), three columns (TOSOH TSK gel SuperH 6000, 4000, and 2500), a differential refractive index detector, and UV-vis detector at a flow rate of 0.6 mL/min. The GPC was calibrated with monodisperse polystyrene standards ( $M_n = 4430\text{--}324200$  g/mol;  $M_w/M_n = 1.03\text{--}1.08$ ), and all molecular weight data are reported as polystyrene equivalents.

## 2. Experimental Procedure

### 2.1. Fluorescence Spectroscopy

Fluorescence measurements were carried out using a spectrofluorometer (JASCO FP-8550) between 350 and 750 nm.

### 2.2. EPR Spectroscopy

Ground samples were transferred into an EPR glass capillary and weighed, and the capillary was sealed after being degassed. EPR measurements were carried out on a JEOL JES-X320 X-band EPR spectrometer. The spectra of the ground samples were measured using a microwave power of 0.1 mW and a field modulation of 0.1 mT with a time constant of 0.03 s and a sweep rate of  $0.25\text{ mT s}^{-1}$  at room temperature. The amount of DAAN radicals were determined by comparing the area of the observed integral spectrum with a 0.05 mM solution of 4-hydroxy-2,2,6,6-tetramethylpiperidin-1-oxyl (TEMPOL) in the benzene under the same experimental conditions. The  $\text{Mn}^{2+}$  signal was used as an auxiliary standard. The  $g$  value was calculated according to the following equation:

$$g = h\nu/\beta H$$

where  $h$  is the Planck constant,  $\nu$  is the microwave frequency,  $\beta$  is the Bohr magneton, and  $H$  is the magnetic field.

### 2.3. Grinding Tests

Grinding tests were performed using mixer mill machine (Retsch MM 400). The mechanical energy was controlled by the frequency of the screw-top grinding jars. The powdered sample was placed in a 10 mL stainless steel screw cap jar containing one 5 mm stainless steel ball. The jar was sealed and locked into the ball-mill machine. The samples were ground for 10–30 min at 30 Hz. All experiments were conducted at room temperature.

## 3. Computational Details

DFT calculations were executed using the Gaussian16 program package. The geometries of the compounds were optimized without symmetry constraints. Calculations were performed using the unrestricted M06-2X with the 6-311+G(d,p) basis set. Frequency calculations were carried out to ensure that the optimized geometries were minima on the potential energy surface, in which no imaginary frequencies were observed in any of the compounds. TD-DFT

calculations were performed using the unrestricted M06-2X with the 6-311+G(d,p) to calculate the first doublet transitions.

#### 4. Preparation of Polymer Samples

Polystyrene (61111) was purchased from ChemcoPlus and used without further purification. Polycarbonate (181676-1SET Lot#08) was purchased from Sigma-Aldrich, dissolved in chloroform and reprecipitated from methanol.

#### 5. Synthesis Procedure

##### 5.1. Synthesis of DAAN-OMe/OMe

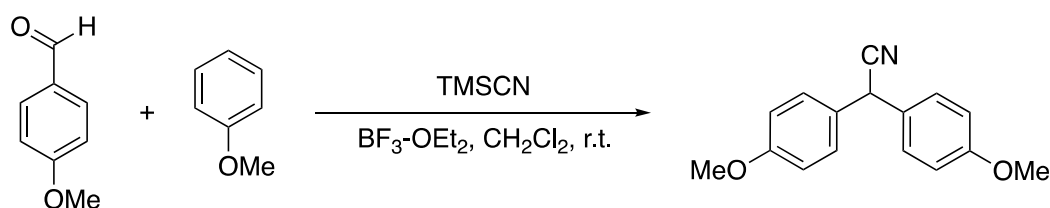

**Scheme S1.** Synthesis scheme of DAAN-OMe/OMe.

DAAN-OMe/OMe was synthesized according to the reported procedure.<sup>1</sup> To a stirred solution of 4-methoxybenzaldehyde (4.80 mL, 39.5 mmol), anisole (5.12 mL, 47.4 mmol, 1.2 equiv), and trimethylsilyl cyanide (7.34 mL, 59.2 mmol, 1.5 equiv.) in CH<sub>2</sub>Cl<sub>2</sub> (200 mL) at 0 °C BF<sub>3</sub>-OEt<sub>2</sub> (5.95 mL, 47.4 mmol, 1.2 equiv.) was added. After being stirred at room temperature for 5.5 h, the reaction mixture was diluted with CH<sub>2</sub>Cl<sub>2</sub>, washed with aq. NaHCO<sub>3</sub> and water. All the organic layers were collected, dried over MgSO<sub>4</sub>. After filtration, evaporation, and recrystallization from a mixed solvent of chloroform and hexane, the precipitate collected by filtration was dried *in vacuo* to give DAAN-OMe/OMe as a white crystal (8.22 g, 82% yield).

<sup>1</sup>H NMR (500 MHz, CDCl<sub>3</sub>): δ/ppm 7.23 (d, *J* = 8.6 Hz, 4H, aromatic), 6.89 (d, *J* = 8.5 Hz, 4H, aromatic), 5.04 (s, 1H, -CH(CN)-), 3.79 (s, 6H, OCH<sub>3</sub>).

<sup>13</sup>C NMR (100 MHz, CDCl<sub>3</sub>): δ/ppm 159.45, 128.89, 128.37, 120.23, 114.57, 55.45, 41.15.

FT-IR (NaBr, cm<sup>-1</sup>): 3052, 3005, 2964, 2934, 2899, 2838, 2243, 1889.9, 1609, 1582, 1446, 1334, 1177, 1115, 970, 865, 812, 808, 768, 632, 595, 542, 512.

EI-MS (*m/z*): [M]<sup>+</sup> calcd for C<sub>16</sub>H<sub>15</sub>NO<sub>2</sub>, 253.1103; found, 253.1102.

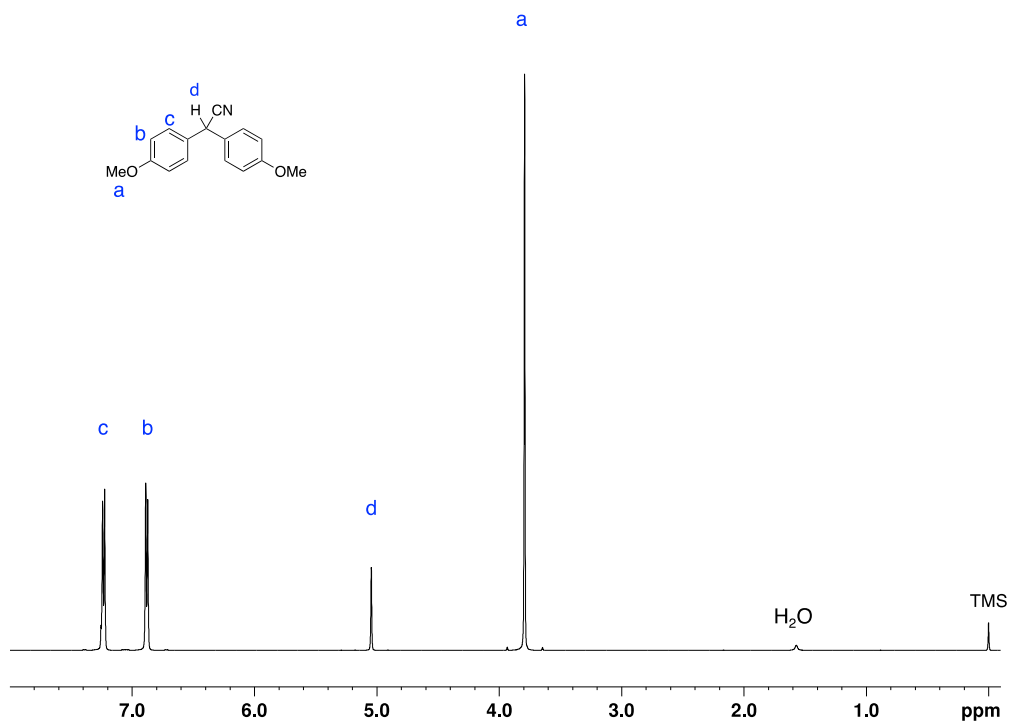

**Figure S1.** <sup>1</sup>H NMR spectrum of DAAN-OMe/OMe (CDCl<sub>3</sub>, 500 MHz).

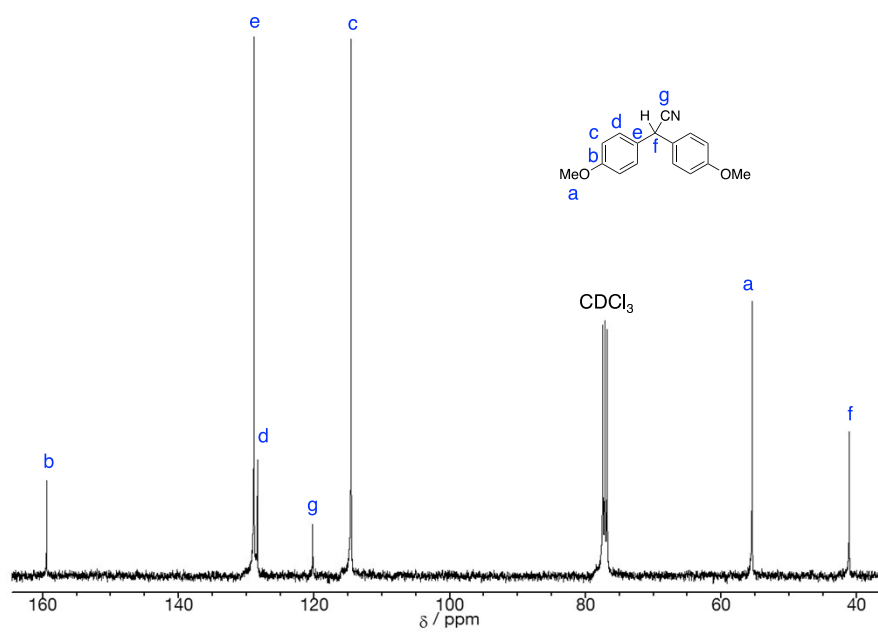

**Figure S2.** <sup>13</sup>C NMR spectrum of DAAN-OMe/OMe (CDCl<sub>3</sub>, 100 MHz).

## 5.2. Synthesis of 1,3-di-*tert*-butyl-2-methoxybenzene

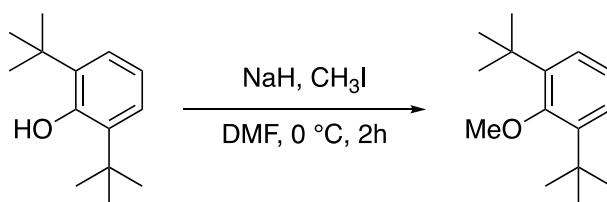

**Scheme S2.** Synthesis scheme of 1,3-di-*tert*-butyl-2-methoxybenzene.

2,6-Di-*tert*-butylphenol (9.36 g, 45 mmol), NaH (2.18 g, 54 mmol), and iodomethane (7.73 g, 54 mmol) were added to DMF (50 mL) at 0 °C for 3 h. The reaction mixture was poured into cold water, extracted with diethyl ether, and dried with Na<sub>2</sub>SO<sub>4</sub>. After filtration and evaporation, the crude product was purified by column chromatography on silica gel eluting with hexane and dried *in vacuo* to give 1,3-di-*tert*-butyl-2-methoxybenzene as colorless liquid (7.82 mg, 78% yield). The spectroscopic results were as reported.<sup>2</sup>

## 5.3. Synthesis of *m*'Bu<sub>2</sub>-DAAN-OMe/OMe

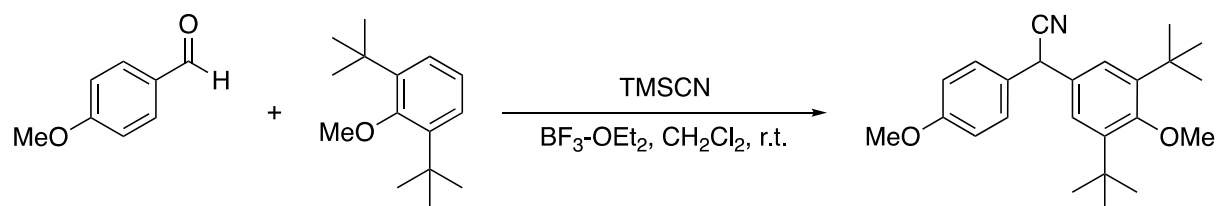

**Scheme S3.** Synthesis scheme of *m*'Bu<sub>2</sub>-DAAN-OMe/OMe.

To a stirred solution of 4-methoxybenzaldehyde (0.67 mL, 5.47 mmol), 1,3-di-*tert*-butyl-2-methoxybenzene (1.36 mL, 6.57 mmol, 1.2 equiv), and trimethylsilyl cyanide (1.02 mL, 8.21 mmol, 1.5 equiv) in CH<sub>2</sub>Cl<sub>2</sub> (25 mL) at 0 °C BF<sub>3</sub>-OEt<sub>2</sub> (0.82 mL, 6.57 mmol, 1.2 equiv) was added. After being stirred at room temperature for 7 h, the reaction mixture was diluted with CH<sub>2</sub>Cl<sub>2</sub>, washed with aq. NaHCO<sub>3</sub> and water. All the organic layers were collected, dried over MgSO<sub>4</sub>. After filtration and evaporation, the crude product was purified by column chromatography on silica gel eluting with CH<sub>2</sub>Cl<sub>2</sub>/hexane (1/9, v/v) and dried *in vacuo* to give *m*'Bu<sub>2</sub>-DAAN-OMe/OMe as a white powder (1.68 g, 84% yield).

<sup>1</sup>H NMR (500 MHz, CDCl<sub>3</sub>): δ/ppm 7.25 (d, *J* = 7.6 Hz, 2H, aromatic), 7.16 (s, 2H, aromatic), 6.90 (d, *J* = 6.9 Hz, 2H, aromatic), 5.02 (s, 1H, -CH(CN)-), 3.81 (s, 3H, OCH<sub>3</sub>), 3.68 (s, 3H, OCH<sub>3</sub>), 1.39 (s, 18H, CH<sub>3</sub>).

<sup>13</sup>C NMR (100 MHz, CDCl<sub>3</sub>): δ/ppm 159.38, 144.56, 130.04, 128.93, 128.34, 126.01, 120.49, 114.48, 64.41, 55.44, 41.86, 36.00, 32.07.

<sup>13</sup>C NMR (100 MHz, acetone-*d*<sub>6</sub>): δ/ppm 159.52, 159.17, 144.23, 131.33, 129.21, 128.78, 125.98, 120.51, 114.48, 64.16, 54.85, 40.96, 35.74, 31.61.

FT-IR (NaBr, cm<sup>-1</sup>): 2962, 2872, 2239, 1999, 1897, 1774, 1610, 1512, 1459, 1413, 1362, 1329, 1306, 1253, 1227, 1182, 1115, 1031, 1004, 929, 885, 837, 814, 772, 723, 658, 585, 550.

EI-MS (m/z): [M]<sup>+</sup> calcd for C<sub>24</sub>H<sub>31</sub>NO<sub>2</sub>, 365.2355; found, 365.2361.

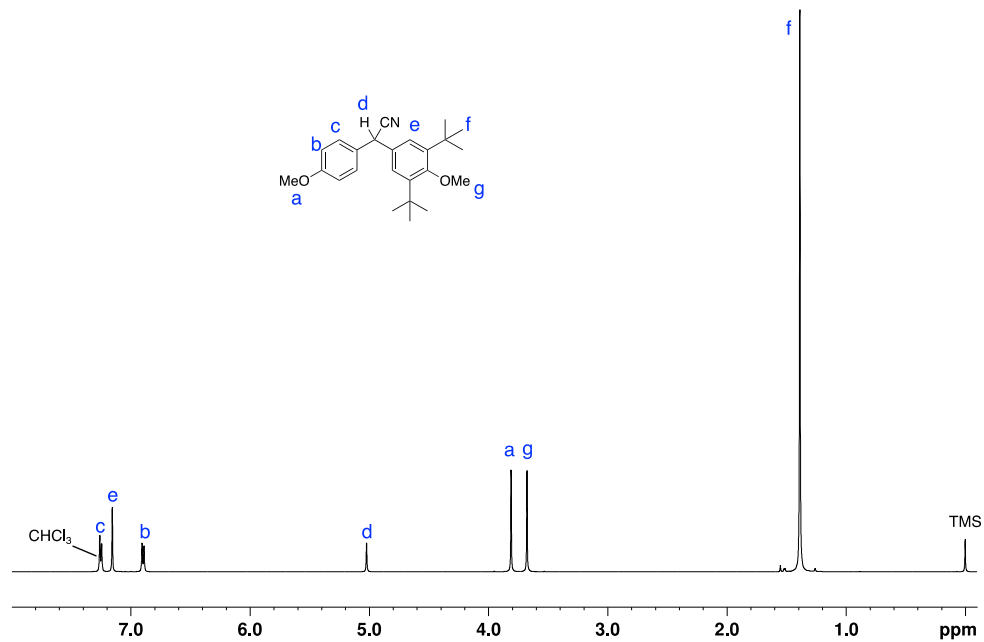

**Figure S3.** <sup>1</sup>H NMR spectrum of *m'*Bu<sub>2</sub>-DAAN-OMe/OMe (CDCl<sub>3</sub>, 500 MHz).

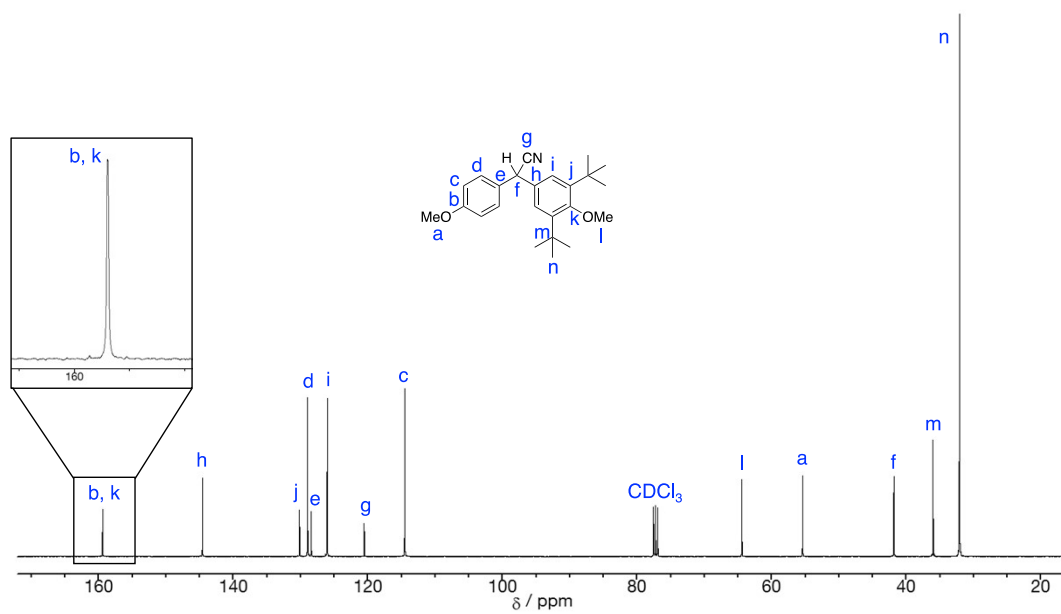

**Figure S4.** <sup>13</sup>C NMR spectrum of *m'*Bu<sub>2</sub>-DAAN-OMe/OMe (CDCl<sub>3</sub>, 100 MHz).

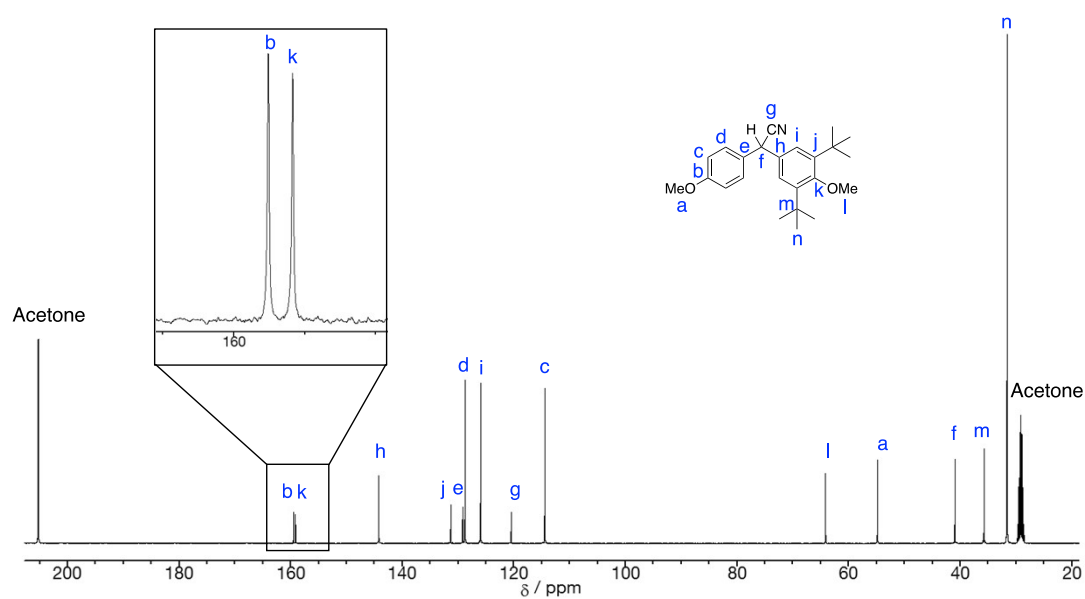

**Figure S5.**  $^{13}\text{C}$  NMR spectrum of *m'*Bu<sub>2</sub>-DAAN-OMe/OMe (acetone-*d*<sub>6</sub>, 100 MHz).

#### 5.4. Synthesis of 3,5-di-*tert*-butyl-4-methoxybenzaldehyde

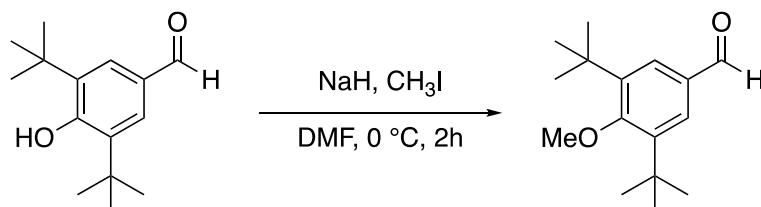

**Scheme S4.** Synthesis scheme of 3,5-di-*tert*-butyl-4-methoxybenzaldehyde.

3,5-Di-*tert*-butyl-4-hydroxybenzaldehyde (4.72 g, 20 mmol), NaH (0.81 g, 20 mmol), and iodomethane (4.29 g, 30 mmol) were added to DMF (50 mL) at 0 °C for 12 h. The reaction mixture was poured into cold water, extracted with diethyl ether, and dried with Na<sub>2</sub>SO<sub>4</sub>. After filtration and evaporation, the crude product was purified by column chromatography on silica gel eluting with CH<sub>2</sub>Cl<sub>2</sub>/hexane (1/9, v/v) and dried *in vacuo* to give 1,3-di-*tert*-butyl-2-methoxybenzene as yellow liquid (4.01 mg, 80% yield). The spectroscopic results were as reported.<sup>3</sup>

### 5.5. Synthesis of *m'*Bu<sub>4</sub>-DAAN-OMe/OMe

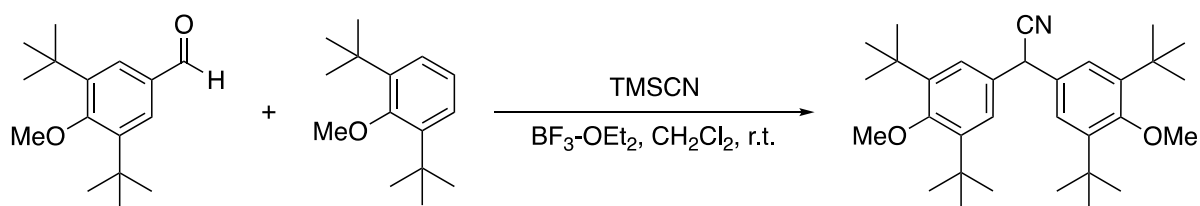

Scheme S5. Synthesis of *m'*Bu<sub>4</sub>-DAAN-OMe/OMe.

To a stirred solution of 3,5-di-*tert*-butyl-4-methoxybenzaldehyde (0.99 mL, 4.47 mmol), 1,3-di-*tert*-butyl-2-methoxybenzene (1.11 mL, 5.36 mmol, 1.2 equiv), and trimethylsilyl cyanide (0.83 mL, 6.70 mmol, 1.5 equiv) in CH<sub>2</sub>Cl<sub>2</sub> (25 mL) at 0 °C was added BF<sub>3</sub>-OEt<sub>2</sub> (0.67 mL, 5.36 mmol, 1.2 equiv). After being stirred at room temperature for 13 h, the reaction mixture was diluted with CH<sub>2</sub>Cl<sub>2</sub>, washed with aq. NaHCO<sub>3</sub> and water. All the organic layers were collected, dried over MgSO<sub>4</sub>. After filtration and evaporation, the crude product was purified by column chromatography on silica gel eluting with CH<sub>2</sub>Cl<sub>2</sub>/hexane (1/9, v/v) and dried *in vacuo* to give *m'*Bu<sub>4</sub>-DAAN-OMe/OMe as a white powder (1.17 g, 58% yield).

<sup>1</sup>H NMR (500 MHz, CDCl<sub>3</sub>): δ/ppm 7.15 (s, 4H, aromatic), 5.01 (s, 1H, -CH(CN)-), 3.68 (s, 6H, OCH<sub>3</sub>), 1.39 (s, 36H, CH<sub>3</sub>).

<sup>13</sup>C NMR (100 MHz, CDCl<sub>3</sub>): δ/ppm 159.30, 144.43, 129.95, 126.16, 120.78, 64.43, 42.21, 36.01, 32.07.

FT-IR (NaBr, cm<sup>-1</sup>): 2961, 2871, 2238, 1717, 1593, 1453, 1414, 1395, 1362, 1267, 1226, 1118, 1011, 928, 883, 795, 771, 680, 647.

EI-MS (m/z): [M]<sup>+</sup> calcd for C<sub>32</sub>H<sub>47</sub>NO<sub>2</sub>, 477.3607; found, 477.3609.

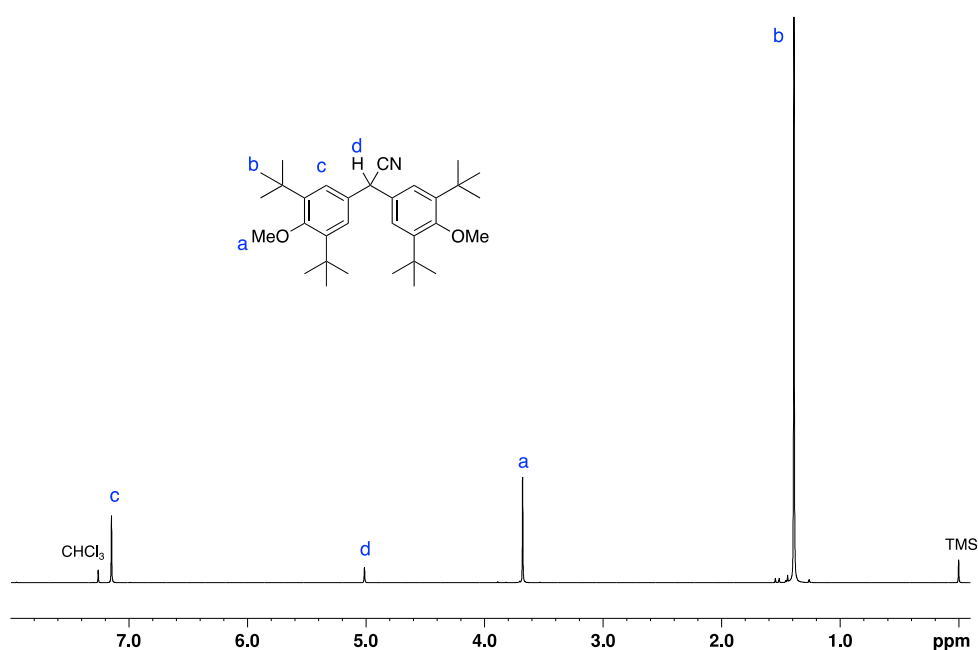

Figure S6. <sup>1</sup>H NMR spectrum of *m'*Bu<sub>4</sub>-DAAN-OMe/OMe (CDCl<sub>3</sub>, 500 MHz).



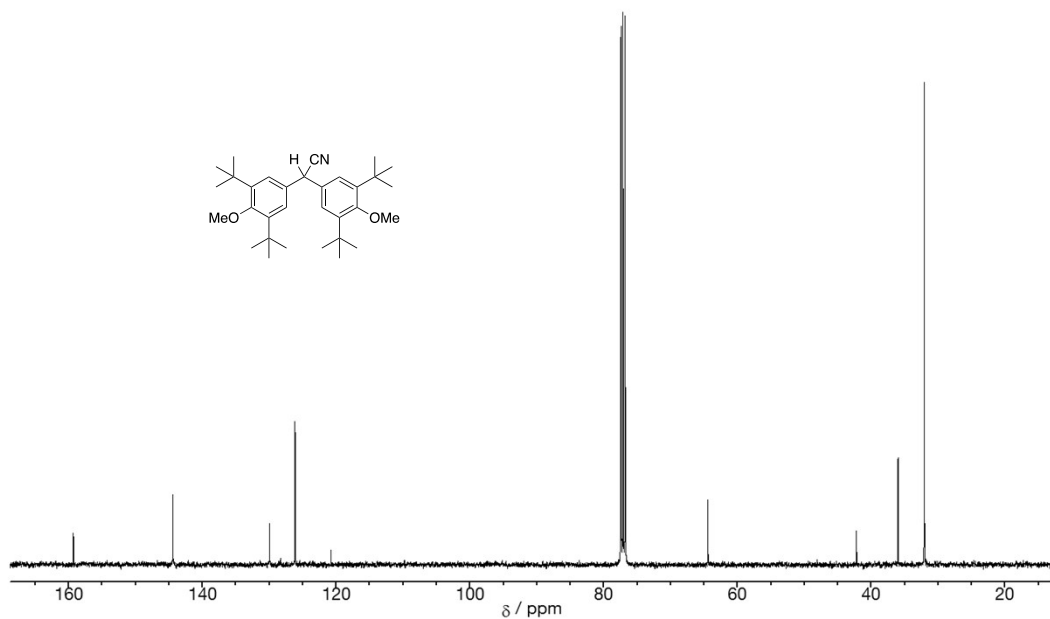

**Figure S7.**  $^{13}\text{C}$  NMR spectrum of *m'*Bu<sub>4</sub>-DAAN-OMe/OMe (CDCl<sub>3</sub>, 100 MHz).

## 6. Supplementary Figures

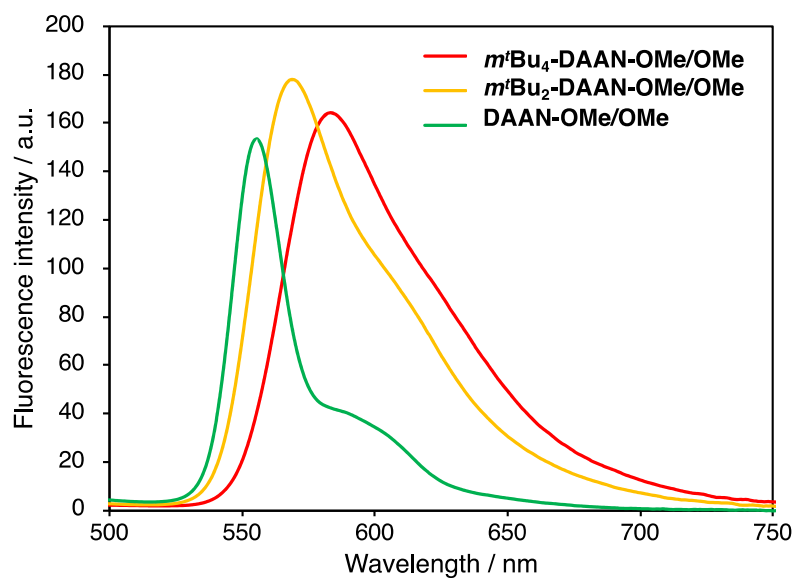

**Figure S8.** Fluorescence spectra ( $\lambda_{\text{ex}}=365$  nm) of a mixture of polystyrene and DAAN derivatives after ball-milling for 30 min.

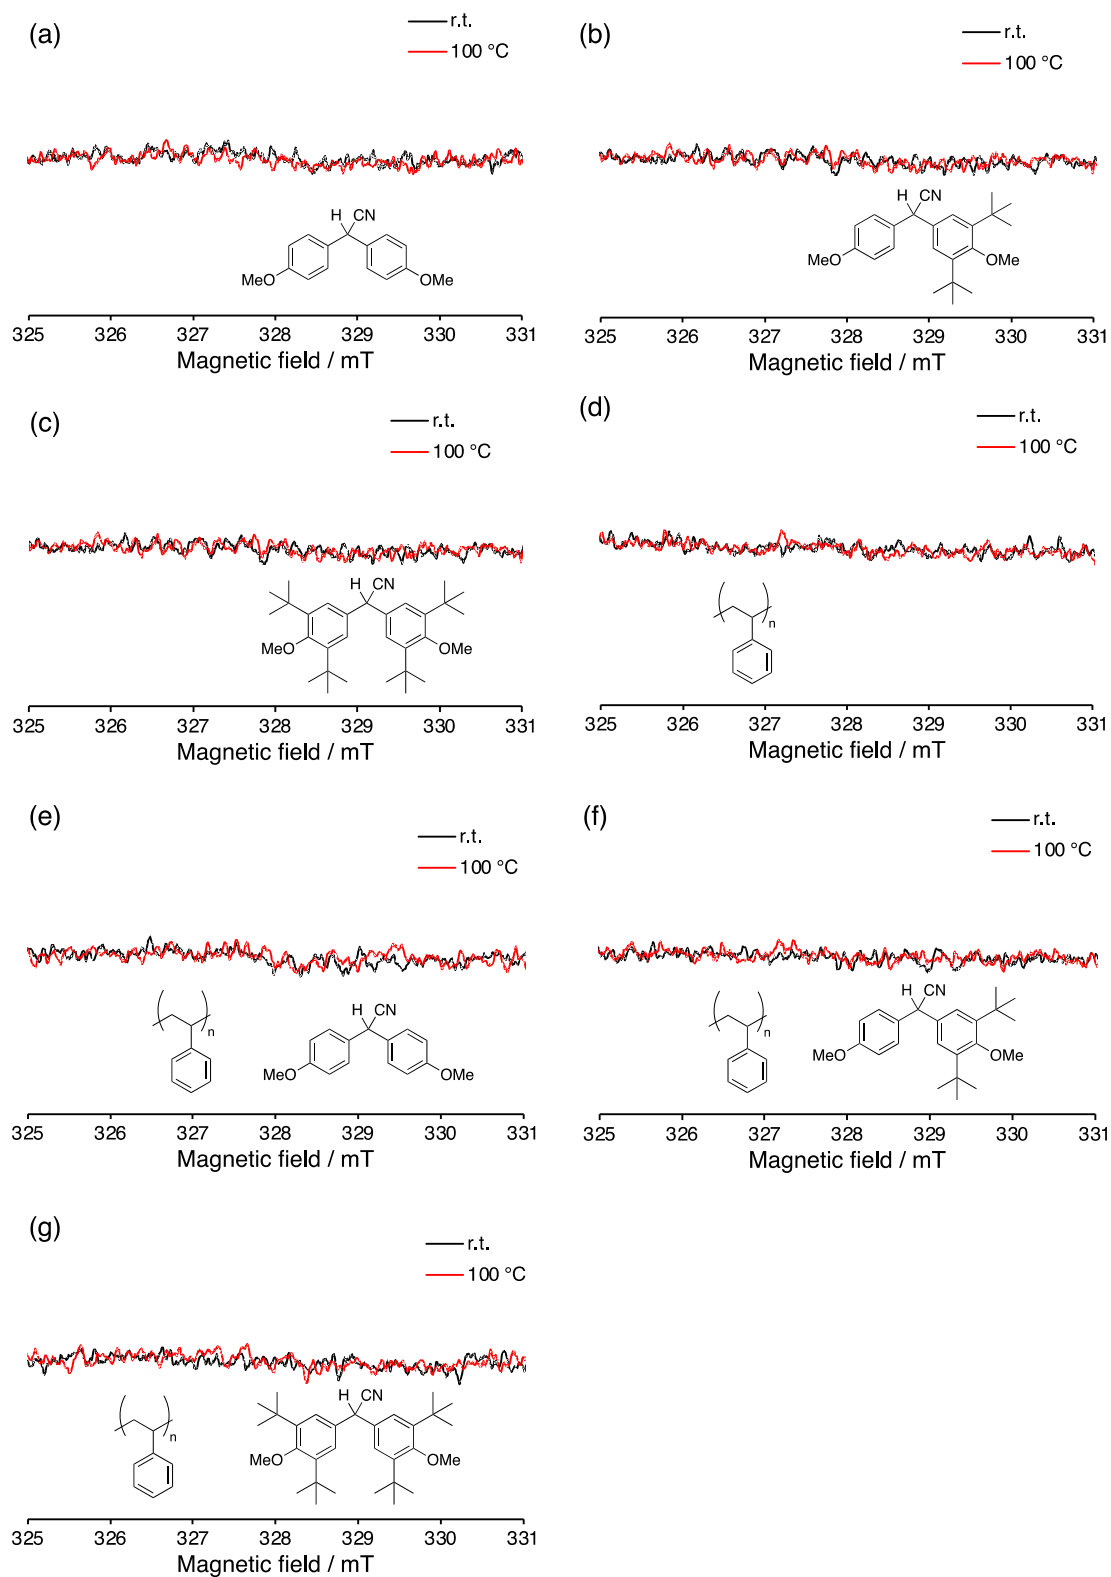

**Figure S9.** EPR spectra of (a) DAAN-OMe/OMe, (b) *m'*Bu<sub>2</sub>-DAAN-OMe/OMe, (c) *m'*Bu<sub>4</sub>-DAAN-OMe/OMe, (d) PS, (e) the mixture of DAAN-OMe/OMe and PS, (f) the mixture of *m'*Bu<sub>2</sub>-DAAN-OMe/OMe and PS, and (g) the mixture of *m'*Bu<sub>4</sub>-DAAN-OMe/OMe and PS at room temperature and 100 °C.

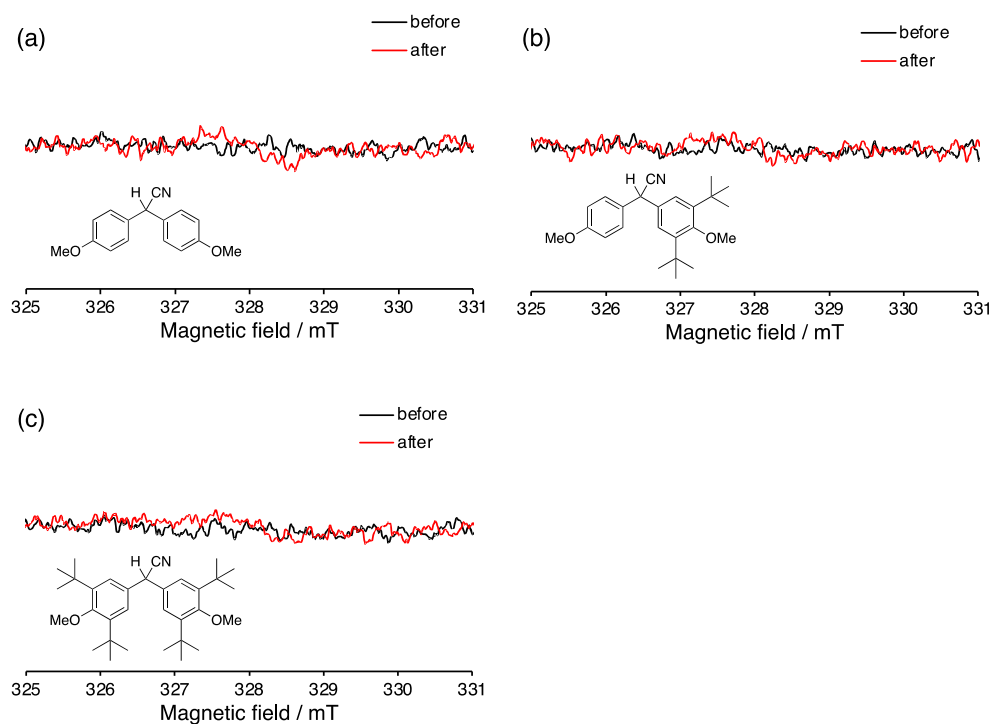

**Figure S10.** EPR spectra of (a) DAAN-OMe/OMe, (b) *m'*Bu<sub>2</sub>-DAAN-OMe/OMe, and (c) *m'*Bu<sub>4</sub>-DAAN-OMe/OMe before and after ball-milling for 30 min.

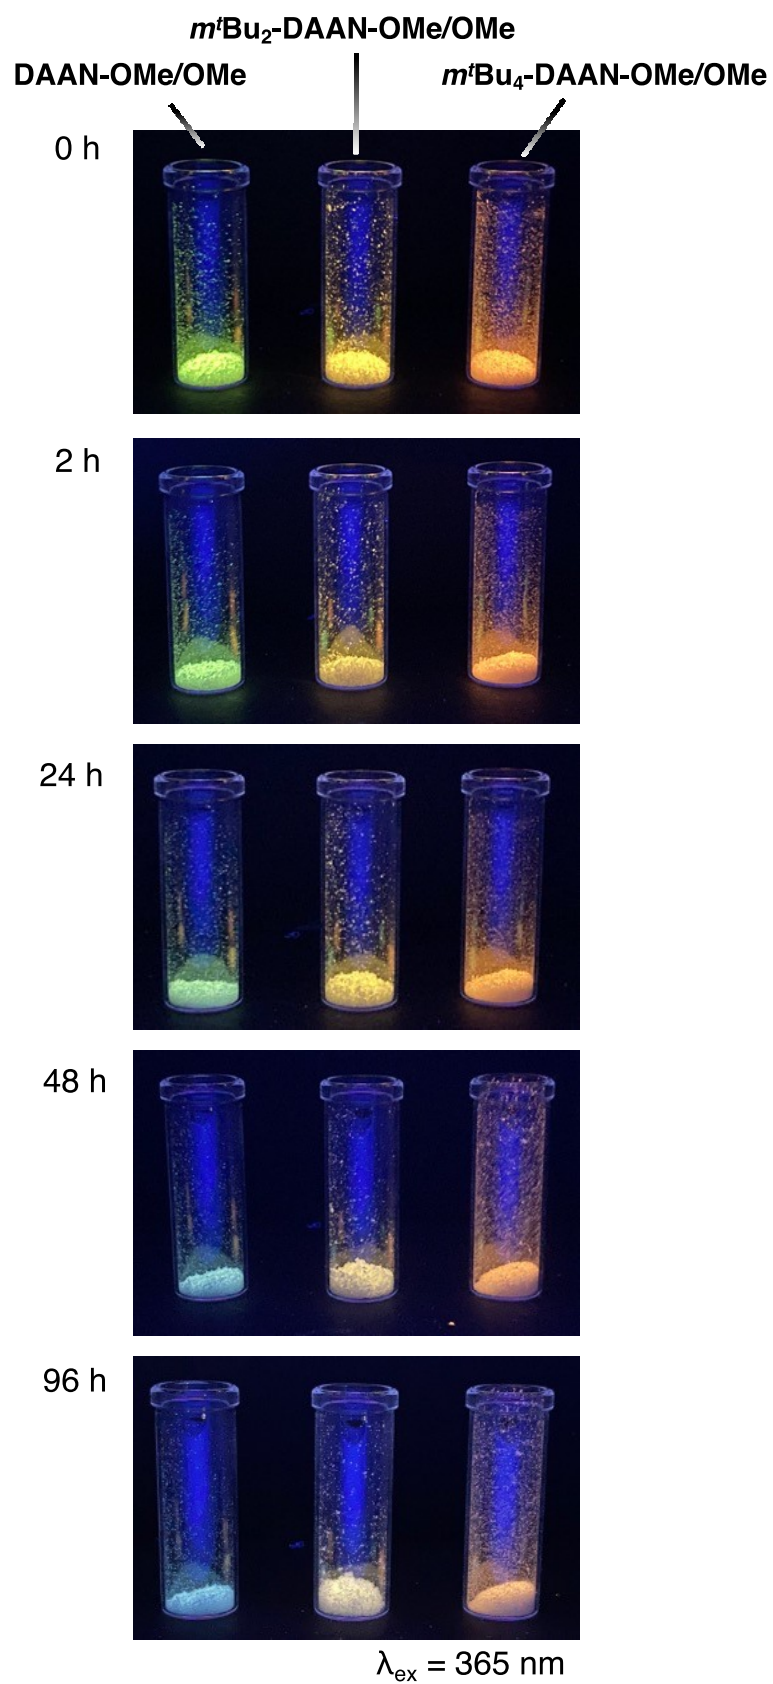

**Figure S11.** Photographs of the samples after ball-milling tests under UV irradiation ( $\lambda_{\text{ex}} = 365 \text{ nm}$ ).

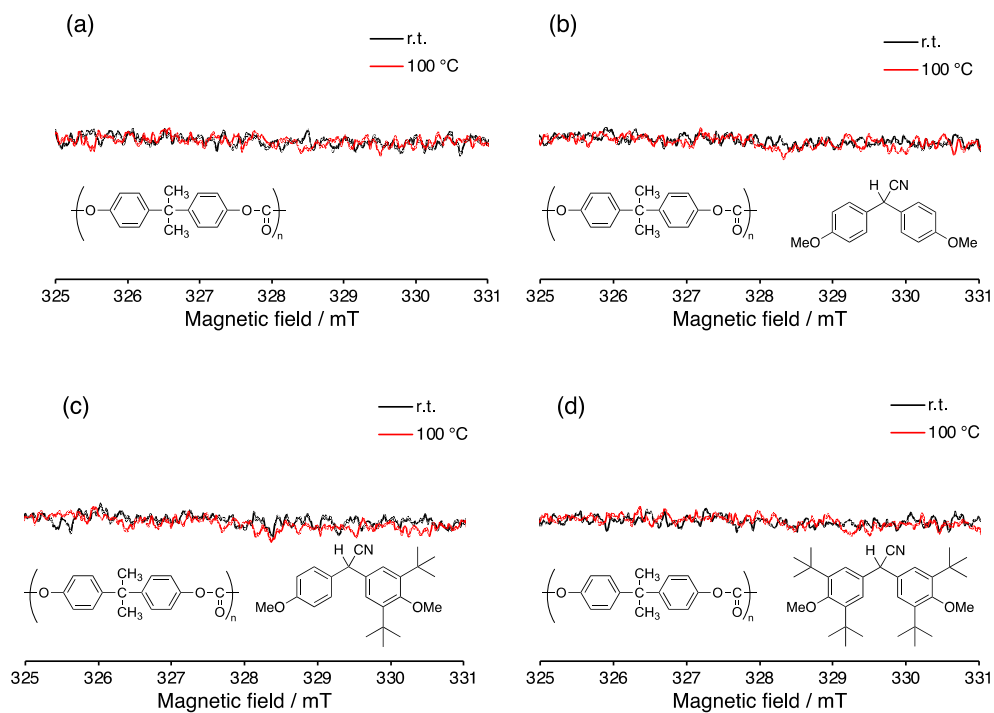

**Figure S12.** EPR spectra of (a) PC, (e) the mixture of DAAN-OMe/OMe and PC, (f) the mixture of  $m'$ Bu<sub>2</sub>-DAAN-OMe/OMe and PC, and (g) the mixture of  $m'$ Bu<sub>4</sub>-DAAN-OMe/OMe and PC at room temperature and 100 °C.

## 7. Calculated and Experimental Peak Wavelengths of DAAN Derivatives

**Table S1.** Calculated and Experimental peak wavelengths of DAAN derivatives

|                                             | $D_1 \rightarrow D_0$ / eV | Calculated fluorescence wavelength / nm | Experimental fluorescence wavelength / nm |
|---------------------------------------------|----------------------------|-----------------------------------------|-------------------------------------------|
| <b>DAAN-OMe/OMe</b>                         | 2.50                       | 496                                     | 555                                       |
| <b><i>m'</i>Bu<sub>2</sub>-DAAN-OMe/OMe</b> | 2.41                       | 515                                     | 568                                       |
| <b><i>m'</i>Bu<sub>4</sub>-DAAN-OMe/OMe</b> | 2.38                       | 521                                     | 583                                       |

## 8. Calculated Fluorescence Properties of DAAN Derivatives Using UM06-2X/6-311+G(d,p)

**Table S2.** The relative orbital emission contributions are indicated ('up' = A, and 'down' =B)

|                                             | $\alpha$ -SOMO | Orbital emission contribution                               | Oscillator strength ( <i>f</i> ) |
|---------------------------------------------|----------------|-------------------------------------------------------------|----------------------------------|
| <b>DAAN-OMe/OMe</b>                         | 67A            | 67A $\leftarrow$ 68A (16%)<br>66B $\leftarrow$ 67B (79%)    | 0.130                            |
| <b><i>m'</i>Bu<sub>2</sub>-DAAN-OMe/OMe</b> | 99A            | 99A $\leftarrow$ 100A (17%)<br>98B $\leftarrow$ 99B (76%)   | 0.105                            |
| <b><i>m'</i>Bu<sub>4</sub>-DAAN-OMe/OMe</b> | 131A           | 131A $\leftarrow$ 32A (16%)<br>130B $\leftarrow$ 131B (77%) | 0.109                            |

## 9. Calculated Angles of DAAN Derivatives Using UM06-2X/6-311+G(d,p)

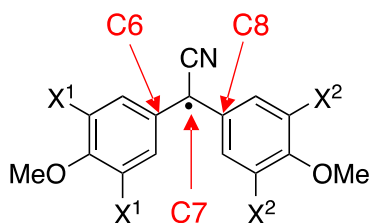

**DAAN-OMe/OMe** : X<sup>1</sup>, X<sup>2</sup> = H  
***m'*Bu<sub>2</sub>-DAAN-OMe/OMe** : X<sup>1</sup> = H, X<sup>2</sup> = <sup>t</sup>Bu  
***m'*Bu<sub>4</sub>-DAAN-OMe/OMe** : X<sup>1</sup>, X<sup>2</sup> = <sup>t</sup>Bu

**Table S3.** Calculated angles of DAAN derivatives using UM06-2X/6-311+G(d,p)

|                                             | State          | Dihedral angle / ° | $\angle C6C7C8$ / ° |
|---------------------------------------------|----------------|--------------------|---------------------|
| <b>DAAN-OMe/OMe</b>                         | D <sub>0</sub> | 44.3               | 125.4               |
|                                             | D <sub>1</sub> | 37.4               | 126.5               |
| <b><i>m'</i>Bu<sub>2</sub>-DAAN-OMe/OMe</b> | D <sub>0</sub> | 44.8               | 125.4               |
|                                             | D <sub>1</sub> | 37.3               | 127.1               |
| <b><i>m'</i>Bu<sub>4</sub>-DAAN-OMe/OMe</b> | D <sub>0</sub> | 49.2               | 124.9               |
|                                             | D <sub>1</sub> | 33.9               | 128.6               |

## 10. Cartesian Coordinates of All the Optimized Geometries by DFT Calculation

DAAN-OMe/OMe of D<sub>0</sub> state optimized with UM06-2X/6-311+G(d,p)

| Center<br>Number | Atomic<br>Number | Atomic<br>Type | Coordinates (Angstroms) |           |           |
|------------------|------------------|----------------|-------------------------|-----------|-----------|
|                  |                  |                | X                       | Y         | Z         |
| 1                | 6                | 0              | 3.693211                | 0.529737  | 0.355087  |
| 2                | 6                | 0              | 2.447702                | 1.138675  | 0.400458  |
| 3                | 6                | 0              | 1.287665                | 0.482810  | -0.042500 |
| 4                | 6                | 0              | 1.437852                | -0.816211 | -0.576856 |
| 5                | 6                | 0              | 2.671445                | -1.426678 | -0.630489 |
| 6                | 6                | 0              | 3.810903                | -0.764754 | -0.155317 |
| 7                | 1                | 0              | 4.557129                | 1.069738  | 0.717483  |
| 8                | 1                | 0              | 2.367547                | 2.144623  | 0.797123  |
| 9                | 1                | 0              | 0.577073                | -1.327008 | -0.989953 |
| 10               | 1                | 0              | 2.792085                | -2.415878 | -1.054417 |
| 11               | 6                | 0              | -1.287679               | 0.482818  | 0.042532  |
| 12               | 6                | 0              | -2.447703               | 1.138667  | -0.400478 |
| 13               | 6                | 0              | -1.437881               | -0.816174 | 0.576952  |
| 14               | 6                | 0              | -3.693216               | 0.529737  | -0.355100 |
| 15               | 1                | 0              | -2.367536               | 2.144596  | -0.797190 |
| 16               | 6                | 0              | -2.671478               | -1.426632 | 0.630594  |
| 17               | 1                | 0              | -0.577111               | -1.326952 | 0.990091  |
| 18               | 6                | 0              | -3.810923               | -0.764727 | 0.155367  |
| 19               | 1                | 0              | -4.557125               | 1.069724  | -0.717540 |
| 20               | 1                | 0              | -2.792131               | -2.415809 | 1.054571  |
| 21               | 6                | 0              | -0.000006               | 2.564734  | -0.000001 |
| 22               | 7                | 0              | 0.000161                | 3.721664  | -0.000376 |
| 23               | 8                | 0              | 4.972691                | -1.450357 | -0.244186 |
| 24               | 8                | 0              | -4.972716               | -1.450321 | 0.244246  |
| 25               | 6                | 0              | 6.153754                | -0.815106 | 0.205107  |
| 26               | 1                | 0              | 6.088602                | -0.571628 | 1.269665  |
| 27               | 1                | 0              | 6.957935                | -1.528906 | 0.044663  |
| 28               | 1                | 0              | 6.353008                | 0.094892  | -0.368392 |
| 29               | 6                | 0              | -6.153774               | -0.815071 | -0.205062 |
| 30               | 1                | 0              | -6.957964               | -1.528851 | -0.044578 |
| 31               | 1                | 0              | -6.353007               | 0.094956  | 0.368399  |
| 32               | 1                | 0              | -6.088631               | -0.571641 | -1.269631 |

33            6            0            -0.000004    1.148497    0.000013

---

*m*'Bu<sub>2</sub>-DAAN-OMe/OMe of D<sub>0</sub> state optimized with UM06-2X/6-311+G(d,p)

---

| Center<br>Number | Atomic<br>Number | Forces (Hartrees/Bohr) |              |              |
|------------------|------------------|------------------------|--------------|--------------|
|                  |                  | X                      | Y            | Z            |
| 1                | 6                | -0.000010654           | -0.000005372 | 0.000002519  |
| 2                | 6                | 0.000003998            | 0.000003911  | -0.000010208 |
| 3                | 6                | 0.000001257            | -0.000000834 | 0.000003565  |
| 4                | 6                | -0.000008544           | -0.000003702 | -0.000001137 |
| 5                | 6                | 0.000007507            | 0.000004171  | -0.000008691 |
| 6                | 6                | 0.000002775            | 0.000001602  | 0.000013016  |
| 7                | 1                | 0.000001167            | -0.000001902 | 0.000000730  |
| 8                | 1                | 0.000001298            | -0.000000858 | 0.000000520  |
| 9                | 6                | -0.000000125           | -0.000003808 | 0.000000224  |
| 10               | 6                | 0.000005054            | 0.000001108  | 0.000001823  |
| 11               | 6                | -0.000004186           | 0.000002417  | -0.000001450 |
| 12               | 6                | 0.000000054            | 0.000003526  | 0.000000137  |
| 13               | 1                | -0.000001222           | 0.000000052  | -0.000000082 |
| 14               | 6                | 0.000005402            | -0.000001148 | 0.000003943  |
| 15               | 1                | -0.000000304           | -0.000000637 | -0.000000276 |
| 16               | 6                | -0.000004741           | -0.000002657 | -0.000003773 |
| 17               | 6                | -0.000001715           | -0.000000701 | 0.000000239  |
| 18               | 7                | -0.000000039           | 0.000000644  | 0.000000184  |
| 19               | 8                | -0.000002134           | 0.000000624  | -0.000001615 |
| 20               | 8                | 0.000000759            | -0.000001269 | 0.000002699  |
| 21               | 6                | -0.000002395           | -0.000002682 | -0.000001549 |
| 22               | 1                | 0.000003550            | 0.000000714  | 0.000000858  |
| 23               | 1                | 0.000000871            | 0.000000853  | -0.000000126 |
| 24               | 1                | 0.000000751            | 0.000001904  | 0.000000734  |
| 25               | 6                | 0.000000477            | 0.000001330  | -0.000002674 |
| 26               | 1                | -0.000000139           | -0.000000035 | 0.000000009  |
| 27               | 1                | 0.000000029            | -0.000000458 | 0.000000842  |
| 28               | 1                | 0.000000134            | 0.000000107  | 0.000000934  |
| 29               | 6                | -0.000000434           | 0.000000662  | 0.000004044  |
| 30               | 1                | 0.000001013            | 0.000000314  | -0.000001318 |



|    |   |              |              |              |
|----|---|--------------|--------------|--------------|
| 31 | 6 | -0.000001061 | -0.000000517 | 0.000001311  |
| 32 | 6 | -0.000000289 | 0.000000925  | -0.000002813 |
| 33 | 1 | 0.000000180  | -0.000000098 | -0.000000243 |
| 34 | 1 | -0.000000172 | -0.000000574 | 0.000000326  |
| 35 | 1 | -0.000000029 | 0.000000681  | 0.000000632  |
| 36 | 6 | 0.000000068  | 0.000001783  | -0.000000137 |
| 37 | 1 | 0.000000446  | -0.000000494 | -0.000000498 |
| 38 | 1 | -0.000000501 | -0.000000339 | -0.000000584 |
| 39 | 1 | -0.000000043 | -0.000001524 | -0.000001880 |
| 40 | 6 | 0.000001742  | -0.000002305 | -0.000001956 |
| 41 | 1 | -0.000000483 | 0.000000491  | -0.000000182 |
| 42 | 1 | 0.000000301  | 0.000001461  | -0.000000742 |
| 43 | 1 | -0.000000668 | 0.000000068  | 0.000000325  |
| 44 | 6 | -0.000000540 | -0.000000162 | -0.000004075 |
| 45 | 6 | 0.000000308  | -0.000000166 | 0.000002190  |
| 46 | 1 | -0.000000522 | 0.000000613  | -0.000000301 |
| 47 | 1 | 0.000000294  | 0.000000422  | 0.000000293  |
| 48 | 1 | 0.000000271  | -0.000000638 | -0.000000408 |
| 49 | 6 | -0.000000928 | 0.000000945  | 0.000002789  |
| 50 | 1 | 0.000001167  | 0.000000065  | -0.000000549 |
| 51 | 1 | 0.000000136  | -0.000000229 | 0.000000328  |
| 52 | 1 | 0.000001014  | 0.000000113  | -0.000000409 |
| 53 | 6 | 0.000000416  | 0.000000893  | -0.000000377 |
| 54 | 1 | -0.000000366 | 0.000000794  | 0.000000327  |
| 55 | 1 | -0.000000372 | -0.000000265 | 0.000000414  |
| 56 | 1 | -0.000000262 | 0.000000558  | 0.000000137  |
| 57 | 1 | -0.000001090 | -0.000001044 | 0.000002229  |
| 58 | 1 | 0.000001522  | 0.000000669  | -0.000000267 |

-----  
***m'*Bu<sub>4</sub>-DAAN-OMe/OMe** of D<sub>0</sub> state optimized with UM06-2X/6-311+G(d,p)

| Center<br>Number | Atomic<br>Number | Forces (Hartrees/Bohr) |              |              |
|------------------|------------------|------------------------|--------------|--------------|
|                  |                  | X                      | Y            | Z            |
| 1                | 6                | 0.000001167            | 0.000002514  | 0.000000221  |
| 2                | 6                | -0.000001647           | -0.000000450 | 0.000003429  |
| 3                | 6                | -0.000000853           | -0.000001377 | -0.000002338 |

|    |   |              |              |              |
|----|---|--------------|--------------|--------------|
| 4  | 6 | 0.000002055  | 0.000000605  | 0.000000874  |
| 5  | 6 | 0.000001461  | -0.000003577 | 0.000000120  |
| 6  | 6 | -0.000003792 | -0.000000811 | -0.000004150 |
| 7  | 1 | -0.000000417 | 0.000000504  | 0.000000624  |
| 8  | 1 | -0.000000856 | -0.000000134 | -0.000000764 |
| 9  | 6 | -0.000001544 | -0.000003458 | -0.000000487 |
| 10 | 6 | -0.000002006 | -0.000002889 | -0.000004257 |
| 11 | 6 | 0.000006787  | -0.000005665 | 0.000000525  |
| 12 | 6 | 0.000000363  | 0.000000060  | 0.000001821  |
| 13 | 1 | 0.000000233  | 0.000000300  | -0.000001402 |
| 14 | 6 | -0.000003496 | -0.000001867 | -0.000006619 |
| 15 | 1 | -0.000002471 | -0.000005624 | 0.000001146  |
| 16 | 6 | 0.000001268  | 0.000001225  | 0.000001653  |
| 17 | 6 | -0.000025581 | -0.000000873 | -0.000027662 |
| 18 | 7 | 0.000013241  | -0.000001074 | 0.000010747  |
| 19 | 8 | 0.000003689  | 0.000002043  | 0.000005989  |
| 20 | 8 | 0.000002511  | 0.000001062  | -0.000007430 |
| 21 | 6 | -0.000001288 | 0.000002236  | -0.000002865 |
| 22 | 1 | 0.000001630  | 0.000002601  | 0.000000745  |
| 23 | 1 | -0.000000395 | 0.000001888  | -0.000000659 |
| 24 | 1 | 0.000000228  | 0.000001238  | -0.000002181 |
| 25 | 6 | 0.000000380  | 0.000003112  | -0.000004569 |
| 26 | 1 | 0.000000588  | -0.000000744 | 0.000000462  |
| 27 | 1 | 0.000000097  | -0.000002236 | -0.000001749 |
| 28 | 1 | 0.000002814  | 0.000004308  | 0.000001641  |
| 29 | 6 | 0.000014051  | -0.000001664 | 0.000013540  |
| 30 | 1 | 0.000000562  | 0.000002937  | -0.000001649 |
| 31 | 6 | -0.000001041 | -0.000001681 | 0.000002029  |
| 32 | 6 | -0.000000029 | -0.000000854 | -0.000001552 |
| 33 | 1 | 0.000000262  | 0.000000147  | -0.000002612 |
| 34 | 1 | -0.000000070 | -0.000000910 | -0.000002300 |
| 35 | 1 | 0.000000095  | 0.000000127  | -0.000001343 |
| 36 | 6 | 0.000005849  | 0.000006020  | -0.000002731 |
| 37 | 1 | -0.000000532 | -0.000000072 | -0.000001359 |
| 38 | 1 | -0.000002079 | 0.000002639  | 0.000000831  |
| 39 | 1 | -0.000002207 | 0.000006301  | 0.000007849  |
| 40 | 6 | 0.000003259  | 0.000000546  | -0.000002178 |
| 41 | 1 | 0.000000332  | 0.000001371  | -0.000001930 |

|    |   |              |              |              |
|----|---|--------------|--------------|--------------|
| 42 | 1 | 0.000001438  | 0.000000406  | -0.000001145 |
| 43 | 1 | 0.000001479  | 0.000000237  | -0.000000712 |
| 44 | 6 | 0.000000455  | 0.000000907  | 0.000005086  |
| 45 | 6 | -0.000000687 | -0.000003647 | 0.000001487  |
| 46 | 1 | -0.000001031 | -0.000001033 | 0.000001697  |
| 47 | 1 | -0.000005995 | -0.000009610 | 0.000000679  |
| 48 | 1 | 0.000000065  | -0.000001415 | 0.000000597  |
| 49 | 6 | 0.000000015  | -0.000002670 | 0.000004444  |
| 50 | 1 | -0.000004735 | -0.000004903 | 0.000001098  |
| 51 | 1 | -0.000001052 | -0.000000288 | 0.000001757  |
| 52 | 1 | -0.000001179 | -0.000000698 | 0.000001106  |
| 53 | 6 | 0.000001261  | 0.000003708  | 0.000000347  |
| 54 | 1 | -0.000000656 | -0.000000743 | 0.000001431  |
| 55 | 1 | 0.000000055  | 0.000002821  | 0.000001719  |
| 56 | 1 | 0.000000152  | -0.000000483 | 0.000002345  |
| 57 | 6 | -0.000000802 | 0.000000709  | 0.000001107  |
| 58 | 6 | 0.000000557  | -0.000001012 | 0.000000169  |
| 59 | 1 | -0.000000638 | -0.000001593 | 0.000000477  |
| 60 | 1 | 0.000000644  | -0.000001214 | -0.000000581 |
| 61 | 1 | -0.000000265 | -0.000001314 | 0.000000518  |
| 62 | 6 | 0.000000038  | -0.000000222 | 0.000001818  |
| 63 | 1 | -0.000000257 | -0.000000431 | 0.000000864  |
| 64 | 1 | -0.000000698 | -0.000001655 | -0.000001316 |
| 65 | 1 | 0.000000083  | -0.000000716 | 0.000001124  |
| 66 | 6 | 0.000001843  | -0.000000097 | -0.000000423 |
| 67 | 1 | -0.000000321 | 0.000001045  | -0.000000087 |
| 68 | 1 | -0.000000113 | -0.000000730 | -0.000000071 |
| 69 | 1 | 0.000000303  | -0.000000434 | -0.000000130 |
| 70 | 6 | -0.000002257 | -0.000000502 | 0.000000563  |
| 71 | 6 | 0.000000508  | 0.000000276  | -0.000000371 |
| 72 | 1 | -0.000000701 | 0.000003116  | -0.000000016 |
| 73 | 1 | -0.000000563 | 0.000000847  | 0.000001631  |
| 74 | 1 | 0.000000012  | 0.000001273  | 0.000001304  |
| 75 | 6 | -0.000000994 | 0.000000918  | -0.000001538 |
| 76 | 1 | -0.000000376 | 0.000001596  | 0.000000591  |
| 77 | 1 | 0.000000237  | 0.000002241  | 0.000000170  |
| 78 | 1 | -0.000002051 | 0.000001790  | -0.000001409 |
| 79 | 6 | 0.000001330  | -0.000000028 | 0.000000029  |

|    |   |             |             |             |
|----|---|-------------|-------------|-------------|
| 80 | 1 | 0.000000397 | 0.000002773 | 0.000001177 |
| 81 | 1 | 0.000000722 | 0.000001571 | 0.000002238 |
| 82 | 1 | 0.000001156 | 0.000001379 | 0.000000763 |

-----

**DAAN-OMe/OMe** of D<sub>1</sub> state optimized with UM06-2X/6-311+G(d,p)

-----

| Center<br>Number | Atomic<br>Number | Atomic<br>Type | Coordinates (Angstroms) |           |           |
|------------------|------------------|----------------|-------------------------|-----------|-----------|
|                  |                  |                | X                       | Y         | Z         |
| 1                | 6                | 0              | 3.711231                | 0.591201  | 0.283577  |
| 2                | 6                | 0              | 2.467640                | 1.166500  | 0.332591  |
| 3                | 6                | 0              | 1.273522                | 0.447799  | -0.029414 |
| 4                | 6                | 0              | 1.463640                | -0.901228 | -0.490198 |
| 5                | 6                | 0              | 2.702495                | -1.473174 | -0.536788 |
| 6                | 6                | 0              | 3.853434                | -0.748758 | -0.136886 |
| 7                | 1                | 0              | 4.574284                | 1.174503  | 0.576546  |
| 8                | 1                | 0              | 2.370006                | 2.195403  | 0.656930  |
| 9                | 1                | 0              | 0.614028                | -1.459414 | -0.859282 |
| 10               | 1                | 0              | 2.841481                | -2.485525 | -0.897208 |
| 11               | 6                | 0              | -1.273523               | 0.447799  | 0.029415  |
| 12               | 6                | 0              | -2.467640               | 1.166499  | -0.332596 |
| 13               | 6                | 0              | -1.463642               | -0.901228 | 0.490201  |
| 14               | 6                | 0              | -3.711231               | 0.591201  | -0.283582 |
| 15               | 1                | 0              | -2.370004               | 2.195401  | -0.656938 |
| 16               | 6                | 0              | -2.702497               | -1.473172 | 0.536791  |
| 17               | 1                | 0              | -0.614031               | -1.459413 | 0.859288  |
| 18               | 6                | 0              | -3.853435               | -0.748756 | 0.136885  |
| 19               | 1                | 0              | -4.574282               | 1.174502  | -0.576556 |
| 20               | 1                | 0              | -2.841485               | -2.485522 | 0.897214  |
| 21               | 6                | 0              | -0.000003               | 2.510490  | -0.000002 |
| 22               | 7                | 0              | 0.000013                | 3.667412  | 0.000006  |
| 23               | 8                | 0              | 5.019048                | -1.416963 | -0.199974 |
| 24               | 8                | 0              | -5.019049               | -1.416961 | 0.199974  |
| 25               | 6                | 0              | 6.203765                | -0.742676 | 0.186600  |
| 26               | 1                | 0              | 6.147829                | -0.427655 | 1.232072  |
| 27               | 1                | 0              | 7.010392                | -1.460543 | 0.063052  |
| 28               | 1                | 0              | 6.382903                | 0.125852  | -0.452854 |

|    |   |   |           |           |           |
|----|---|---|-----------|-----------|-----------|
| 29 | 6 | 0 | -6.203766 | -0.742673 | -0.186601 |
| 30 | 1 | 0 | -7.010394 | -1.460538 | -0.063049 |
| 31 | 1 | 0 | -6.382901 | 0.125858  | 0.452851  |
| 32 | 1 | 0 | -6.147832 | -0.427656 | -1.232073 |
| 33 | 6 | 0 | -0.000001 | 1.089220  | 0.000002  |

-----  
***m'*Bu<sub>2</sub>-DAAN-OMe/OMe** of D<sub>1</sub> state optimized with UM06-2X/6-311+G(d,p)

| Center<br>Number | Atomic<br>Number | Atomic<br>Type | Coordinates (Angstroms) |           |           |
|------------------|------------------|----------------|-------------------------|-----------|-----------|
|                  |                  |                | X                       | Y         | Z         |
| 1                | 6                | 0              | -2.450692               | -0.903599 | 0.173841  |
| 2                | 6                | 0              | -1.203310               | -1.456085 | 0.106744  |
| 3                | 6                | 0              | -0.001572               | -0.684175 | -0.086605 |
| 4                | 6                | 0              | -0.149867               | 0.749891  | -0.090531 |
| 5                | 6                | 0              | -1.372709               | 1.358996  | -0.063551 |
| 6                | 6                | 0              | -2.549875               | 0.519453  | -0.056297 |
| 7                | 1                | 0              | -1.079438               | -2.522202 | 0.250482  |
| 8                | 1                | 0              | 0.739076                | 1.351263  | -0.184729 |
| 9                | 6                | 0              | 2.551812                | -0.773915 | -0.081892 |
| 10               | 6                | 0              | 3.695647                | -1.371263 | -0.695459 |
| 11               | 6                | 0              | 2.805736                | 0.346149  | 0.772050  |
| 12               | 6                | 0              | 4.967264                | -0.876508 | -0.517639 |
| 13               | 1                | 0              | 3.549570                | -2.239961 | -1.326473 |
| 14               | 6                | 0              | 4.070464                | 0.840374  | 0.950437  |
| 15               | 1                | 0              | 1.990780                | 0.780891  | 1.335486  |
| 16               | 6                | 0              | 5.173798                | 0.250312  | 0.298530  |
| 17               | 6                | 0              | 1.190989                | -2.694712 | -0.689114 |
| 18               | 7                | 0              | 1.136096                | -3.798119 | -1.032567 |
| 19               | 8                | 0              | -3.742437               | 1.093940  | -0.367631 |
| 20               | 8                | 0              | 6.370746                | 0.825850  | 0.526411  |
| 21               | 6                | 0              | -4.224997               | 0.769409  | -1.671988 |
| 22               | 1                | 0              | -4.273374               | -0.311575 | -1.815573 |
| 23               | 1                | 0              | -5.222319               | 1.199726  | -1.751383 |
| 24               | 1                | 0              | -3.568207               | 1.202817  | -2.431193 |
| 25               | 6                | 0              | 7.512277                | 0.266733  | -0.097364 |
| 26               | 1                | 0              | 8.354398                | 0.878837  | 0.215203  |

|    |   |   |           |           |           |
|----|---|---|-----------|-----------|-----------|
| 27 | 1 | 0 | 7.668173  | -0.765677 | 0.227690  |
| 28 | 1 | 0 | 7.417732  | 0.300497  | -1.186318 |
| 29 | 6 | 0 | 1.248086  | -1.338049 | -0.265757 |
| 30 | 6 | 0 | -1.506750 | 2.885908  | -0.032830 |
| 31 | 6 | 0 | -0.136836 | 3.563066  | 0.109824  |
| 32 | 1 | 0 | 0.396674  | 3.214292  | 0.997714  |
| 33 | 1 | 0 | 0.495301  | 3.396830  | -0.766117 |
| 34 | 1 | 0 | -0.284871 | 4.640486  | 0.210316  |
| 35 | 6 | 0 | -2.357347 | 3.285398  | 1.187659  |
| 36 | 1 | 0 | -2.448955 | 4.374459  | 1.229228  |
| 37 | 1 | 0 | -3.358489 | 2.858212  | 1.134310  |
| 38 | 1 | 0 | -1.880145 | 2.948828  | 2.111823  |
| 39 | 6 | 0 | -2.156447 | 3.430495  | -1.319584 |
| 40 | 1 | 0 | -1.645275 | 3.045996  | -2.206511 |
| 41 | 1 | 0 | -3.213478 | 3.178333  | -1.377437 |
| 42 | 1 | 0 | -2.072397 | 4.520739  | -1.330050 |
| 43 | 6 | 0 | -3.628623 | -1.813734 | 0.582419  |
| 44 | 6 | 0 | -4.949383 | -1.081745 | 0.873090  |
| 45 | 1 | 0 | -5.638890 | -1.796565 | 1.329258  |
| 46 | 1 | 0 | -4.805428 | -0.255285 | 1.571247  |
| 47 | 1 | 0 | -5.433797 | -0.691957 | -0.020706 |
| 48 | 6 | 0 | -3.868300 | -2.886449 | -0.494344 |
| 49 | 1 | 0 | -2.971077 | -3.483988 | -0.667354 |
| 50 | 1 | 0 | -4.669054 | -3.557503 | -0.171223 |
| 51 | 1 | 0 | -4.164953 | -2.444261 | -1.448212 |
| 52 | 6 | 0 | -3.236774 | -2.521761 | 1.898415  |
| 53 | 1 | 0 | -2.353515 | -3.150021 | 1.785023  |
| 54 | 1 | 0 | -3.035837 | -1.788361 | 2.683146  |
| 55 | 1 | 0 | -4.061321 | -3.159767 | 2.226612  |
| 56 | 1 | 0 | 5.796063  | -1.361479 | -1.016035 |
| 57 | 1 | 0 | 4.258355  | 1.679783  | 1.609167  |

-----  
***m*'Bu<sub>4</sub>-DAAN-OMe/OMe** of D<sub>1</sub> state optimized with UM06-2X/6-311+G(d,p)

-----  
Center      Atomic      Atomic      Coordinates (Angstroms)  
Number      Number      Type      X              Y              Z  
-----

|    |   |   |           |           |           |
|----|---|---|-----------|-----------|-----------|
| 1  | 6 | 0 | 3.711671  | -1.019671 | -0.414955 |
| 2  | 6 | 0 | 2.424488  | -1.488190 | -0.473151 |
| 3  | 6 | 0 | 1.284191  | -0.737443 | -0.032167 |
| 4  | 6 | 0 | 1.532524  | 0.617064  | 0.374779  |
| 5  | 6 | 0 | 2.801426  | 1.129065  | 0.486501  |
| 6  | 6 | 0 | 3.908325  | 0.259936  | 0.203917  |
| 7  | 1 | 0 | 2.232368  | -2.464676 | -0.899144 |
| 8  | 1 | 0 | 0.694130  | 1.223469  | 0.675115  |
| 9  | 6 | 0 | -1.284187 | -0.737514 | 0.031911  |
| 10 | 6 | 0 | -2.424397 | -1.488256 | 0.472992  |
| 11 | 6 | 0 | -1.532585 | 0.616903  | -0.375166 |
| 12 | 6 | 0 | -3.711613 | -1.019716 | 0.414987  |
| 13 | 1 | 0 | -2.232243 | -2.464772 | 0.898901  |
| 14 | 6 | 0 | -2.801524 | 1.128918  | -0.486717 |
| 15 | 1 | 0 | -0.694243 | 1.223261  | -0.675744 |
| 16 | 6 | 0 | -3.908345 | 0.259856  | -0.203835 |
| 17 | 6 | 0 | 0.000094  | -2.781326 | -0.000036 |
| 18 | 7 | 0 | 0.000176  | -3.937953 | 0.000030  |
| 19 | 8 | 0 | 5.151433  | 0.662003  | 0.593670  |
| 20 | 8 | 0 | -5.151573 | 0.662025  | -0.593176 |
| 21 | 6 | 0 | 5.639432  | -0.021253 | 1.747571  |
| 22 | 1 | 0 | 5.645488  | -1.101704 | 1.592321  |
| 23 | 1 | 0 | 6.655464  | 0.334648  | 1.913586  |
| 24 | 1 | 0 | 5.015105  | 0.211099  | 2.614650  |
| 25 | 6 | 0 | -5.639877 | -0.021066 | -1.747039 |
| 26 | 1 | 0 | -6.655895 | 0.334983  | -1.912834 |
| 27 | 1 | 0 | -5.015694 | 0.211259  | -2.614227 |
| 28 | 1 | 0 | -5.646056 | -1.101529 | -1.591879 |
| 29 | 6 | 0 | 0.000029  | -1.356382 | -0.000115 |
| 30 | 6 | 0 | -3.041514 | 2.592954  | -0.882750 |
| 31 | 6 | 0 | -1.720641 | 3.368441  | -0.969244 |
| 32 | 1 | 0 | -1.169281 | 3.321765  | -0.027059 |
| 33 | 1 | 0 | -1.077166 | 3.000016  | -1.772868 |
| 34 | 1 | 0 | -1.939419 | 4.418222  | -1.176949 |
| 35 | 6 | 0 | -3.901011 | 3.268716  | 0.202936  |
| 36 | 1 | 0 | -4.061003 | 4.318695  | -0.058439 |
| 37 | 1 | 0 | -4.872970 | 2.786601  | 0.301929  |
| 38 | 1 | 0 | -3.390579 | 3.233225  | 1.169041  |

|    |   |   |           |           |           |
|----|---|---|-----------|-----------|-----------|
| 39 | 6 | 0 | -3.741032 | 2.714775  | -2.249344 |
| 40 | 1 | 0 | -4.780653 | 2.396544  | -2.200994 |
| 41 | 1 | 0 | -3.728287 | 3.760873  | -2.567717 |
| 42 | 1 | 0 | -3.219480 | 2.126203  | -3.009195 |
| 43 | 6 | 0 | -4.816838 | -1.863595 | 1.086779  |
| 44 | 6 | 0 | -4.357140 | -2.174738 | 2.528652  |
| 45 | 1 | 0 | -3.436931 | -2.757859 | 2.556982  |
| 46 | 1 | 0 | -4.192807 | -1.249677 | 3.086619  |
| 47 | 1 | 0 | -5.132406 | -2.751439 | 3.039391  |
| 48 | 6 | 0 | -4.996703 | -3.194839 | 0.336712  |
| 49 | 1 | 0 | -4.061614 | -3.757257 | 0.295900  |
| 50 | 1 | 0 | -5.742342 | -3.808115 | 0.850455  |
| 51 | 1 | 0 | -5.338412 | -3.039449 | -0.689125 |
| 52 | 6 | 0 | -6.180988 | -1.166496 | 1.222703  |
| 53 | 1 | 0 | -6.809708 | -1.778537 | 1.874395  |
| 54 | 1 | 0 | -6.082841 | -0.178057 | 1.674788  |
| 55 | 1 | 0 | -6.708255 | -1.056670 | 0.276720  |
| 56 | 6 | 0 | 3.041403  | 2.593100  | 0.882502  |
| 57 | 6 | 0 | 1.720575  | 3.368730  | 0.968365  |
| 58 | 1 | 0 | 1.169617  | 3.322035  | 0.025945  |
| 59 | 1 | 0 | 1.076716  | 3.000429  | 1.771739  |
| 60 | 1 | 0 | 1.939368  | 4.418503  | 1.176090  |
| 61 | 6 | 0 | 3.901455  | 3.268685  | -0.202856 |
| 62 | 1 | 0 | 4.061452  | 4.318662  | 0.058519  |
| 63 | 1 | 0 | 4.873404  | 2.786455  | -0.301393 |
| 64 | 1 | 0 | 3.391441  | 3.233190  | -1.169181 |
| 65 | 6 | 0 | 3.740333  | 2.714917  | 2.249400  |
| 66 | 1 | 0 | 3.218343  | 2.126489  | 3.009061  |
| 67 | 1 | 0 | 4.779923  | 2.396508  | 2.201541  |
| 68 | 1 | 0 | 3.727615  | 3.761043  | 2.567682  |
| 69 | 6 | 0 | 4.817012  | -1.863484 | -1.086624 |
| 70 | 6 | 0 | 6.181189  | -1.166373 | -1.222194 |
| 71 | 1 | 0 | 6.810054  | -1.778358 | -1.873800 |
| 72 | 1 | 0 | 6.083144  | -0.177895 | -1.674218 |
| 73 | 1 | 0 | 6.708246  | -1.056629 | -0.276082 |
| 74 | 6 | 0 | 4.996731  | -3.194808 | -0.336664 |
| 75 | 1 | 0 | 4.061635  | -3.757228 | -0.296078 |
| 76 | 1 | 0 | 5.742463  | -3.808031 | -0.850336 |



|    |   |   |          |           |           |
|----|---|---|----------|-----------|-----------|
| 77 | 1 | 0 | 5.338256 | -3.039524 | 0.689252  |
| 78 | 6 | 0 | 4.357570 | -2.174461 | -2.528613 |
| 79 | 1 | 0 | 3.437335 | -2.757532 | -2.557158 |
| 80 | 1 | 0 | 4.193380 | -1.249337 | -3.086517 |
| 81 | 1 | 0 | 5.132902 | -2.751148 | -3.039268 |

---

## 11. Extracted Results of TD-DFT Calculation

**DAAN-OMe/OMe** of D<sub>1</sub> state optimized with UM06-2X/6-311+G(d,p)

67A is SOMO.

Excited State 1: 2.116-A 2.4988 eV 496.18 nm f=0.1304 <S\*\*2>=0.869

67A → 68A 0.39452

65B → 71B -0.10477

66B → 67B 0.89147

**m'Bu<sub>2</sub>-DAAN-OMe/OMe** of D<sub>1</sub> state optimized with UM06-2X/6-311+G(d,p)

99A is SOMO.

Excited State 1: 2.128-A 2.4063 eV 515.25 nm f=0.1047 <S\*\*2>=0.882

99A → 100A 0.41391

96B → 101B 0.10429

98B → 99B 0.86969

**m'Bu<sub>4</sub>-DAAN-OMe/OMe** of D<sub>1</sub> state optimized with UM06-2X/6-311+G(d,p)

131A is SOMO.

Excited State 1: 2.134-A 2.3795 eV 521.04 nm f=0.1091 <S\*\*2>=0.888

131A → 132A -0.39652

127B → 133B 0.10563

130B → 131B 0.88144

## References

- 1 D. K. Singh, S. S. Prasad, J. Kim and I. Kim, *Org. Chem. Front.*, 2019, **6**, 669–673.
- 2 E. M. Igumnova, E. Mishchenko, T. Haug, H.-M. Blencke, J. U. E. Sollid, E. G. A. Fredheim, S. Lauksund, K. Stensvåg and M. B. Strøm, *Bioorg. Med. Chem.*, 2018, **26**, 4930–4941.
- 3 Y. Zhang, Z. Pan, H. Guo, J. Yang and J. Zhang, *Tetrahedron Lett.*, 2022, **107**, 154120.
